# Supplementary material
Source: HighWire-hosted journal article supplement (https://bmjopen.bmj.com/content/7/3/e014957)
Supplement: inline-supplementary-material-1 [file inline-supplementary-material-1.pdf]

Date Conducted: October 1, 2016.

|                                                                                                                                                                           |
|---------------------------------------------------------------------------------------------------------------------------------------------------------------------------|
| <b>Database:</b>                                                                                                                                                          |
| PubMed                                                                                                                                                                    |
| <b>User query:</b>                                                                                                                                                        |
| (exercise OR physical activity OR physical fitness OR physical therapy) AND (osteoarthritis OR rheumatoid arthritis OR arthritis OR fibromyalgia) AND anxiety AND random* |

|                      |                                                                                                                                                                                                                                                                   |
|----------------------|-------------------------------------------------------------------------------------------------------------------------------------------------------------------------------------------------------------------------------------------------------------------|
| exercise             | "exercise"[MeSH Terms] OR "exercise"[All Fields]                                                                                                                                                                                                                  |
| physical activity    | "motor activity"[MeSH Terms] OR ("motor"[All Fields] AND "activity"[All Fields]) OR "motor activity"[All Fields] OR ("physical"[All Fields] AND "activity"[All Fields]) OR "physical activity"[All Fields]                                                        |
| physical fitness     | "physical fitness"[MeSH Terms] OR ("physical"[All Fields] AND "fitness"[All Fields]) OR "physical fitness"[All Fields]                                                                                                                                            |
| physical therapy     | "physical therapy modalities"[MeSH Terms] OR ("physical"[All Fields] AND "therapy"[All Fields] AND "modalities"[All Fields]) OR "physical therapy modalities"[All Fields] OR ("physical"[All Fields] AND "therapy"[All Fields]) OR "physical therapy"[All Fields] |
| osteoarthritis       | "osteoarthritis"[MeSH Terms] OR "osteoarthritis"[All Fields]                                                                                                                                                                                                      |
| rheumatoid arthritis | "arthritis, rheumatoid"[MeSH Terms] OR ("arthritis"[All Fields] AND "rheumatoid"[All Fields]) OR "rheumatoid arthritis"[All Fields] OR ("rheumatoid"[All Fields] AND "arthritis"[All Fields])                                                                     |
| arthritis            | "arthritis"[MeSH Terms] OR "arthritis"[All Fields]                                                                                                                                                                                                                |
| fibromyalgia         | "fibromyalgia"[MeSH Terms] OR "fibromyalgia"[All Fields]                                                                                                                                                                                                          |
| anxiety              | "anxiety"[MeSH Terms] OR "anxiety"[All Fields]                                                                                                                                                                                                                    |
